# Supplementary material
Source: PubMed Central journal article supplement (PMC3791687)

# Supplementary Figure 1

**A**

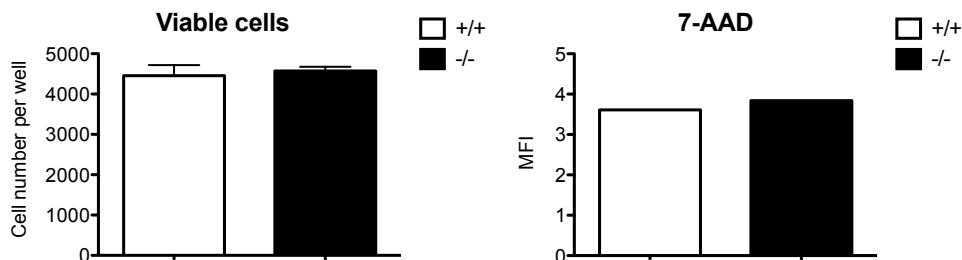

**B**

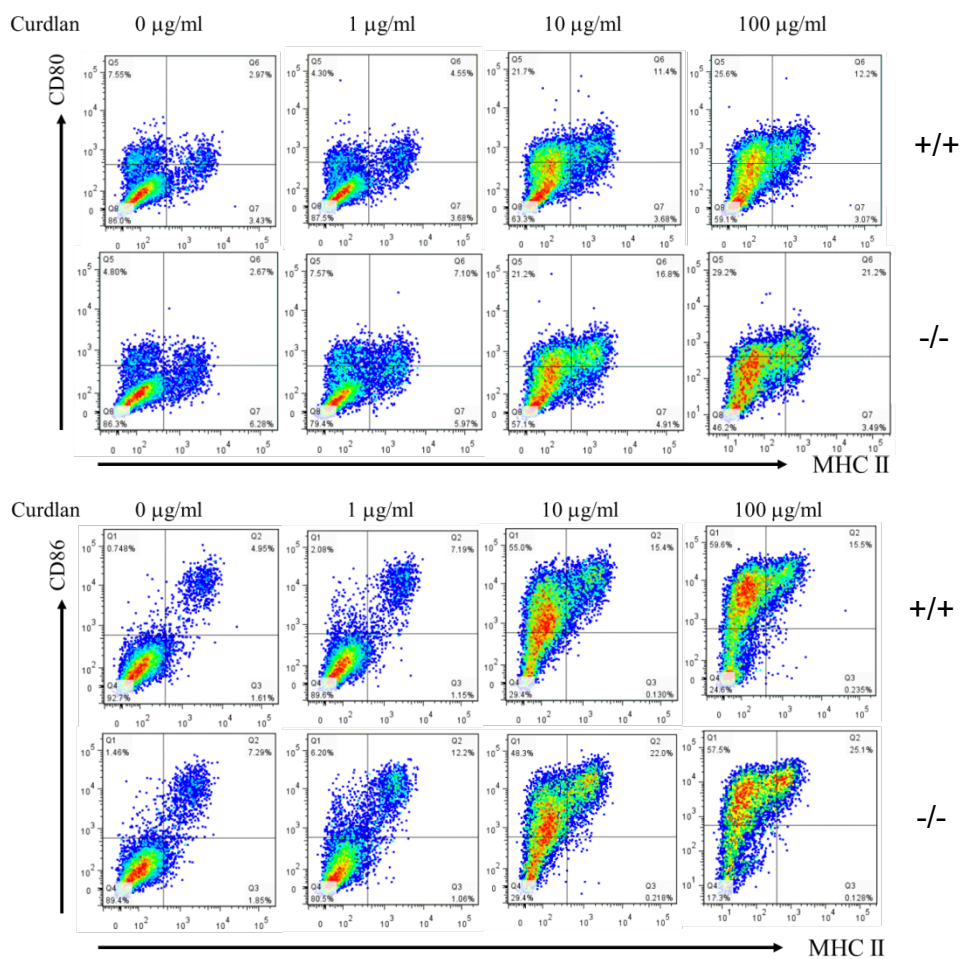

**C**

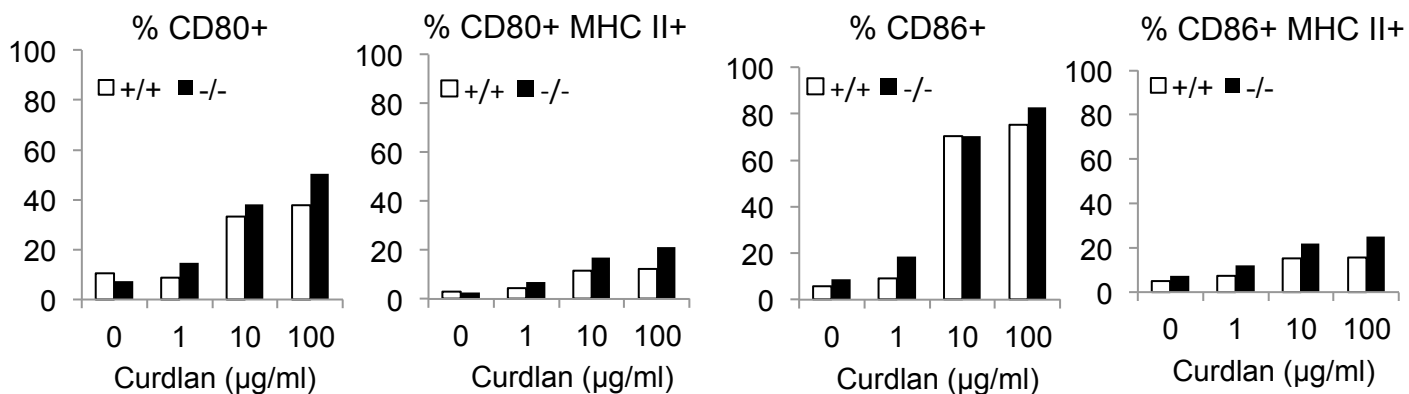

Supplement: mmc1.pdf [file mmc1.pdf]

Supplementary Figure 2

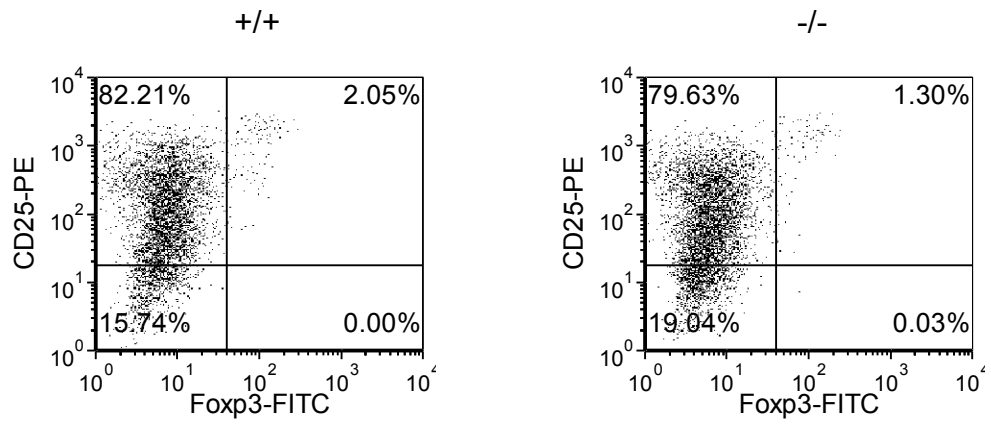

Supplement: mmc2.pdf [file mmc2.pdf]
